# Supplementary material for: Outbreak of P.3 (Theta) SARS-CoV-2 emerging variant of concern among service workers in Louisiana
Source: bioRxiv or medRxiv preprint supplement (doi:10.1101/2021.07.28.21259040), 2021-07-30

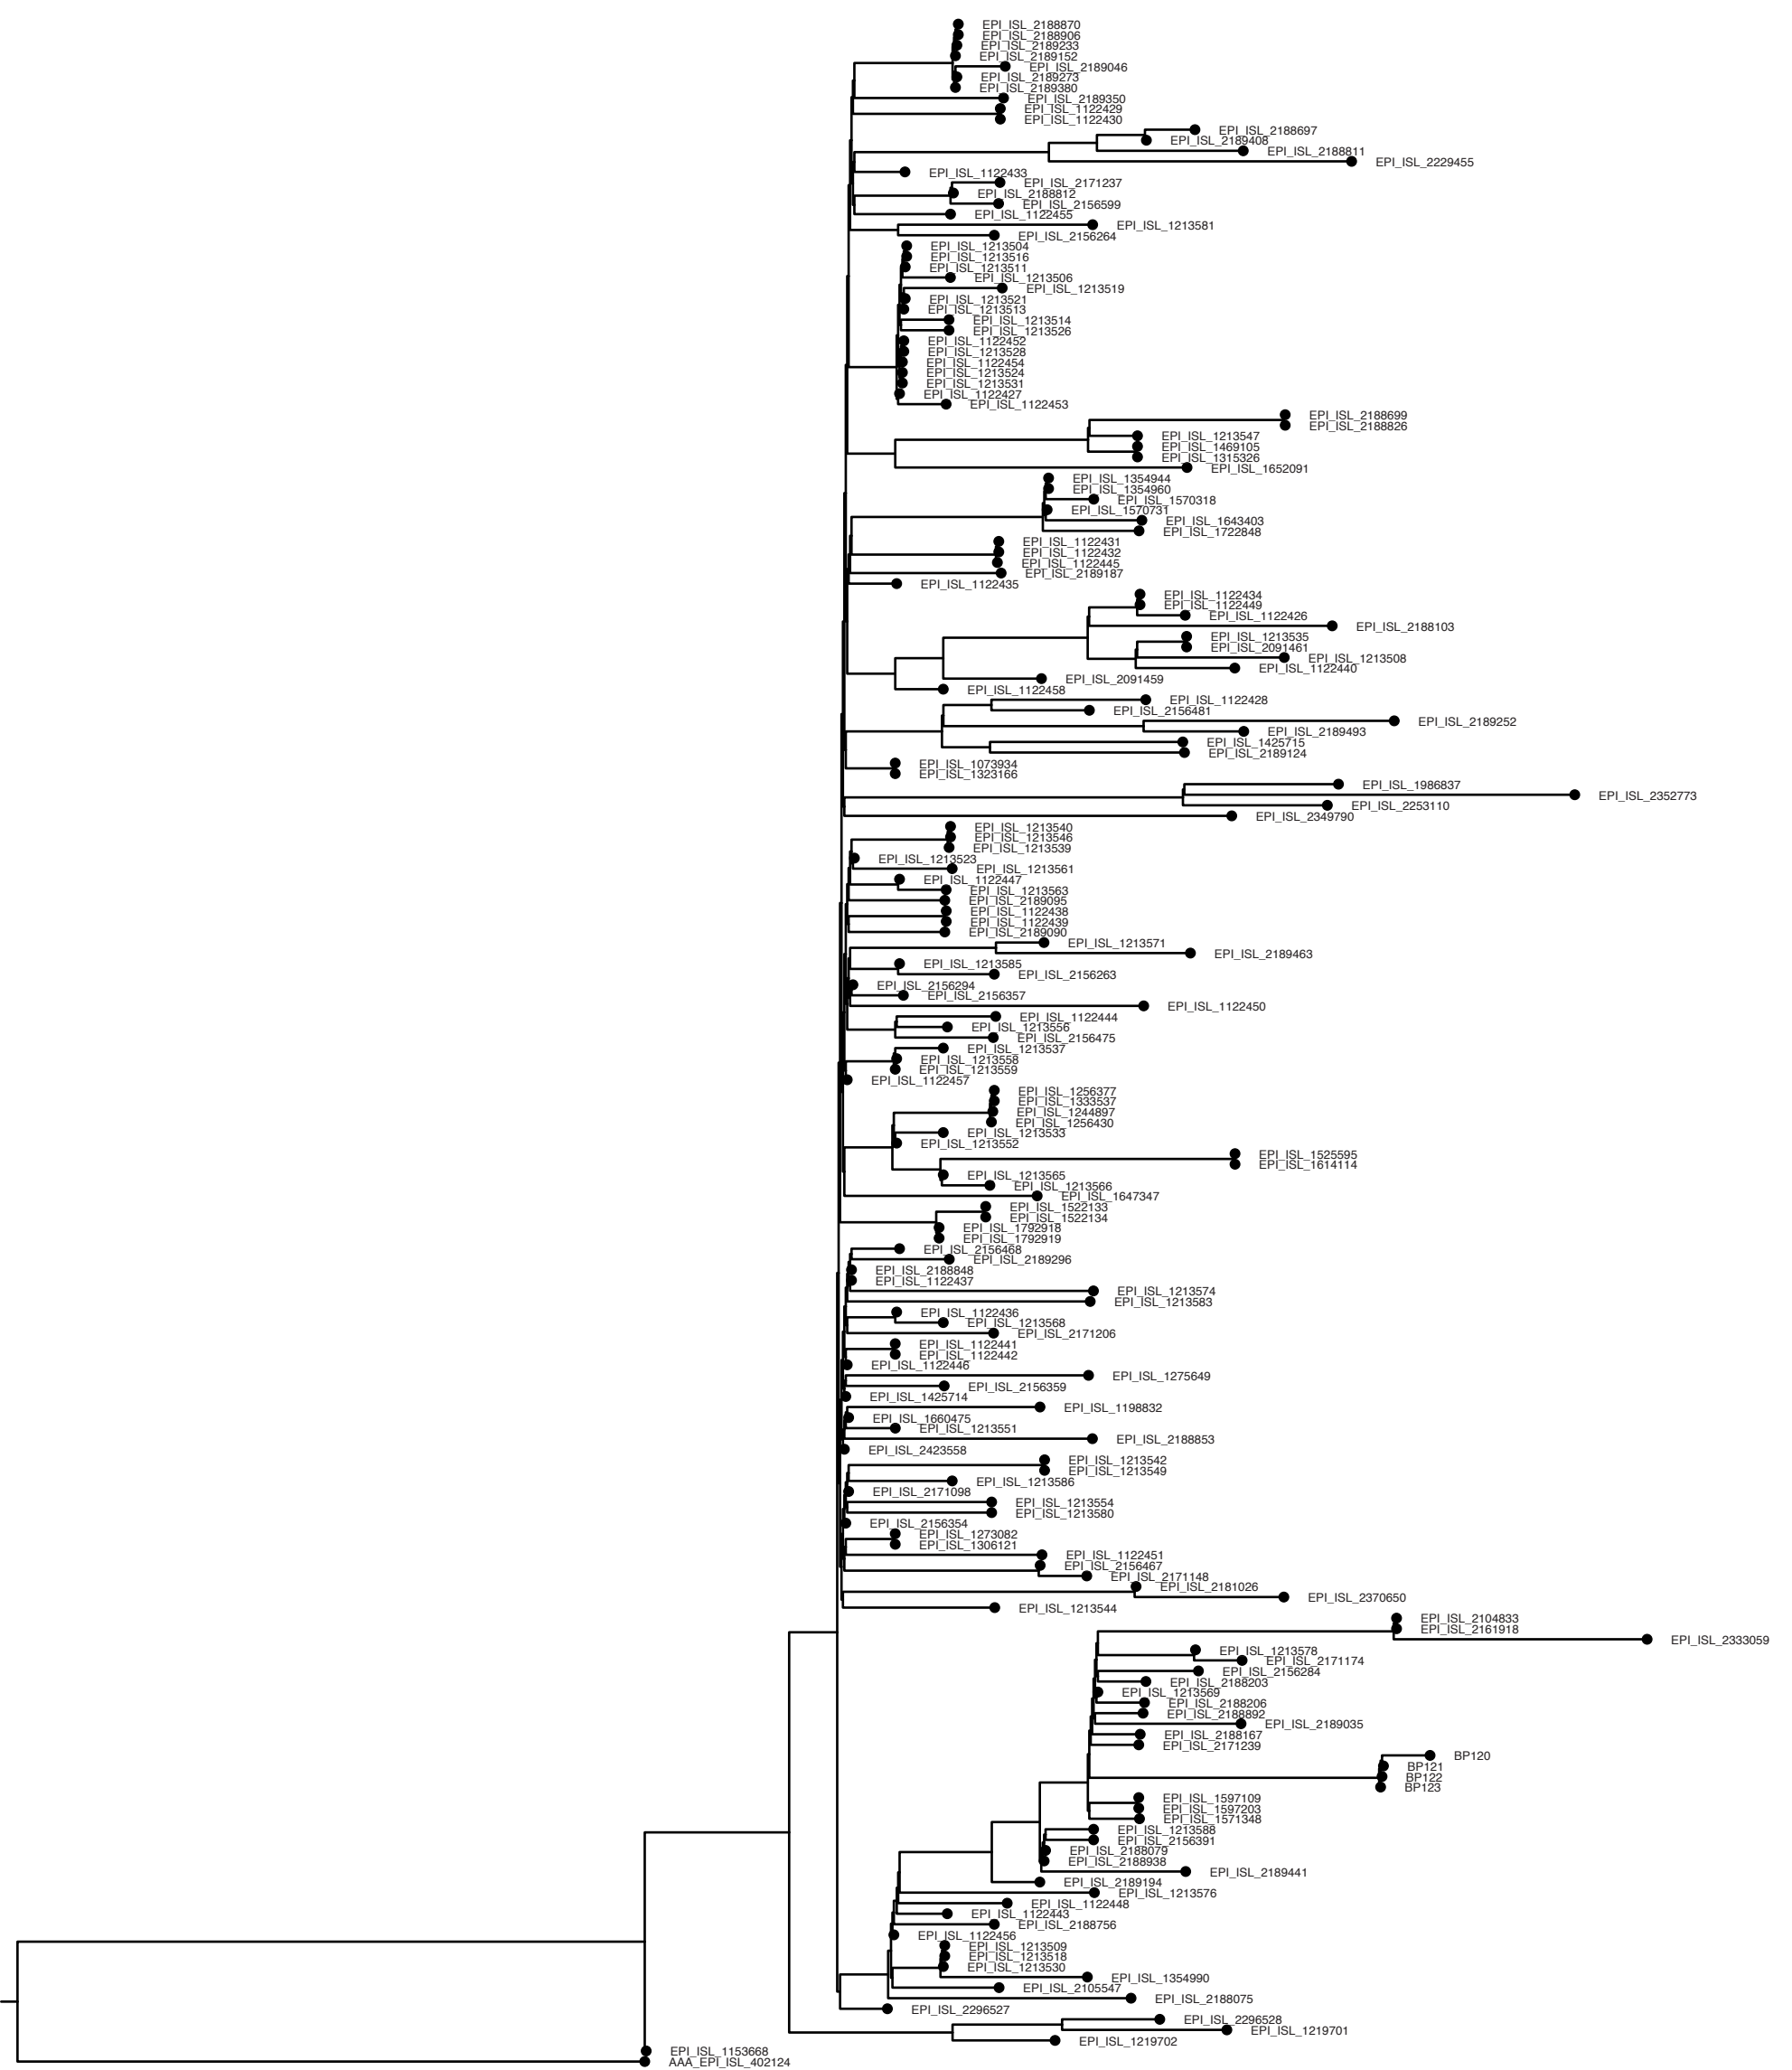

Supplement: Supplementary file [file media-2.pdf]
